# Supplementary material for: Rapid upslope shifts in New Guinean birds illustrate strong distributional responses of tropical montane species to global warming
Source: HighWire-hosted journal article supplement (doi:10.1073/pnas.1318190111), 2014-02-18
Supplement: pnas.201318190SI.pdf [file pnas.201318190SI.pdf]

# Supporting Information

## Freeman and Class Freeman 10.1073/pnas.1318190111

**Table S1. Elevational changes in Mt. Karimui's avifauna**

| English name                  | Latin name                           | Diet        | Lower limit<br>(1965), m (1) | Upper limit<br>(1965), m (1) | Lower limit<br>(2012), m | Upper limit<br>(2012), m | Lower limit<br>change, m | Upper limit<br>change, m |
|-------------------------------|--------------------------------------|-------------|------------------------------|------------------------------|--------------------------|--------------------------|--------------------------|--------------------------|
| Pacific Baza                  | <i>Aviceda subcristata</i>           | Carnivore   | NA                           | 1,250                        | NA                       | 1,203                    | NA                       | -47                      |
| Papuan Eagle                  | <i>Harpyopsis novaeguineae</i>       | Carnivore   | NA                           | 1,981                        | NA                       | 1,888                    | NA                       | -93                      |
| Gray-Headed Goshawk           | <i>Accipiter poliocephalus</i>       | Carnivore   | NA                           | 1,524                        | NA                       | 1,163                    | NA                       | -361                     |
| Brahminy Kite                 | <i>Haliastur indus</i>               | Carnivore   | NA                           | 2,012                        | NA                       | 2,383                    | NA                       | 371                      |
| Slender-Billed Cuckoo-Dove    | <i>Macropygia amboinensis</i>        | Frugivore   | NA                           | 1,372                        | NA                       | 1,903                    | NA                       | 531                      |
| Bar-Tailed Cuckoo-Dove        | <i>Macropygia nigrirostris</i>       | Frugivore   | NA                           | 2,316                        | NA                       | 2,520                    | NA                       | 204                      |
| Great Cuckoo-Dove             | <i>Reinwardtoena reinwardti</i>      | Frugivore   | NA                           | 2,063                        | NA                       | 2,233                    | NA                       | 170                      |
| Stephan's Emerald Dove        | <i>Chalcophaps stephani</i>          | Frugivore   | NA                           | 1,113                        | NA                       | 1,423                    | NA                       | 310                      |
| Cinnamon Ground Dove          | <i>Gallilolumba rufigula</i>         | Frugivore   | NA                           | 1,113                        | NA                       | 1,288                    | NA                       | 175                      |
| Bronze Ground Dove            | <i>Gallilolumba beccarii</i>         | Frugivore   | 1,762                        | 2,219                        | 1,363                    | 2,068                    | -399                     | -151                     |
| Pheasant Pigeon               | <i>Otidiphaps nobilis</i>            | Frugivore   | NA                           | 1,113                        | NA                       | 1,658                    | NA                       | 545                      |
| Wompo Fruit Dove              | <i>Ptilinopus magnificus</i>         | Frugivore   | NA                           | 1,219                        | NA                       | 1,033                    | NA                       | -186                     |
| Ornate Fruit Dove             | <i>Ptilinopus ornatus</i>            | Frugivore   | NA                           | 1,981                        | NA                       | 1,888                    | NA                       | -93                      |
| Beautiful Fruit Dove          | <i>Ptilinopus pulchellus</i>         | Frugivore   | NA                           | 1,448                        | NA                       | 1,243                    | NA                       | -205                     |
| White-Bibbed Fruit Dove       | <i>Ptilinopus rivoli</i>             | Frugivore   | 1,113                        | 2,219                        | 1,243                    | 2,105                    | 130                      | -114                     |
| Purple-Tailed Imperial Pigeon | <i>Ducula rufigaster</i>             | Frugivore   | NA                           | 1,113                        | NA                       | 1,283                    | NA                       | 170                      |
| Zoe's Imperial Pigeon         | <i>Ducula zoeae</i>                  | Frugivore   | NA                           | 1,113                        | NA                       | 2,083                    | NA                       | 970                      |
| Papuan Mountain Pigeon        | <i>Gymnophaps albertisii</i>         | Frugivore   | NA                           | 2,134                        | NA                       | 2,333                    | NA                       | 199                      |
| Sulfur-Crested Cockatoo       | <i>Cacatua galerita</i>              | Frugivore   | NA                           | 1,762                        | NA                       | 2,373                    | NA                       | 611                      |
| Coconut Lorikeet              | <i>Trichoglossus hematodus</i>       | Nectarivore | NA                           | 1,463                        | NA                       | 1,423                    | NA                       | -40                      |
| Black-Capped Lory             | <i>Lorius lory</i>                   | Nectarivore | NA                           | 1,448                        | NA                       | 1,423                    | NA                       | -25                      |
| Red-Flanked Lorikeet          | <i>Charmosyna placentis</i>          | Nectarivore | NA                           | 1,448                        | NA                       | 1,323                    | NA                       | -125                     |
| Fairy Lorikeet                | <i>Charmosyna pulchella</i>          | Nectarivore | 1,341                        | 1,612                        | 1,323                    | 1,913                    | -18                      | 301                      |
| Plum-Faced Lorikeet           | <i>Oreopsittacus arfaki</i>          | Nectarivore | 1,707                        | 2,323                        | 1,943                    | 2,263                    | 236                      | -60                      |
| Brehm's Tiger Parrot          | <i>Psittacella brehmii</i>           | Frugivore   | 1,707                        | 2,219                        | 1,765                    | 2,235                    | 58                       | 16                       |
| Red-Cheeked Parrot            | <i>Geoffroyus geoffroyi</i>          | Frugivore   | NA                           | 1,113                        | NA                       | 1,243                    | NA                       | 130                      |
| Blue-Collared Parrot          | <i>Geoffroyus simplex</i>            | Frugivore   | 991                          | 1,463                        | 1,033                    | 1,710                    | 42                       | 247                      |
| Large Fig Parrot              | <i>Psittaculirostris desmarestii</i> | Frugivore   | NA                           | 1,280                        | NA                       | 1,243                    | NA                       | -37                      |
| Ivory-Billed Coucal           | <i>Centropus menbeki</i>             | Insectivore | NA                           | 1,311                        | NA                       | 1,233                    | NA                       | -78                      |
| White-Eared Bronze Cuckoo     | <i>Chrysococcyx meyerii</i>          | Insectivore | 610                          | 1,448                        | NA                       | 1,813                    | NA                       | 365                      |
| White-Crowned Cuckoo          | <i>Cacomantis leucolophus</i>        | Omnivore    | NA                           | 1,737                        | NA                       | 2,200                    | NA                       | 463                      |
| Chestnut-Breasted Cuckoo      | <i>Cacomantis castaneiventris</i>    | Insectivore | 610                          | 1,448                        | NA                       | 1,593                    | NA                       | 145                      |
| Papuan Boobook                | <i>Ninox theomacha</i>               | Carnivore   | NA                           | 1,981                        | NA                       | 2,093                    | NA                       | 112                      |
| Marbled Frogmouth             | <i>Podargus ocellatus</i>            | Insectivore | NA                           | 1,113                        | NA                       | 1,233                    | NA                       | 120                      |
| Glossy Swiftlet               | <i>Collocalia esculenta</i>          | Insectivore | NA                           | 2,520                        | NA                       | 2,520                    | NA                       | 0                        |
| Hook-Billed Kingfisher        | <i>Melidora macrorrhina</i>          | Insectivore | NA                           | 1,113                        | NA                       | 1,873                    | NA                       | 760                      |
| Mountain Kingfisher           | <i>Syma megarhyncha</i>              | Insectivore | 1,341                        | 1,737                        | 1,773                    | 2,158                    | 432                      | 421                      |
| Variable Dwarf Kingfisher     | <i>Ceyx lepidus</i>                  | Insectivore | NA                           | 1,113                        | NA                       | 1,388                    | NA                       | 275                      |
| Red-Bellied Pitta             | <i>Erythropitta erythrogaster</i>    | Insectivore | NA                           | 1,113                        | NA                       | 1,198                    | NA                       | 85                       |
| White-Eared Catbird           | <i>Ailuroedus buccoides</i>          | Frugivore   | NA                           | 1,113                        | NA                       | 1,303                    | NA                       | 190                      |
| Spotted Catbird               | <i>Ailuroedus melanotis</i>          | Frugivore   | 1,311                        | 1,661                        | 1,366                    | 1,703                    | 55                       | 42                       |
| MacGregor's Bowerbird         | <i>Amblyornis macgregoriae</i>       | Frugivore   | 1,585                        | 1,981                        | 1,693                    | 2,243                    | 108                      | 262                      |
| Papuan Black Myzomela         | <i>Myzomela nigrita</i>              | Nectarivore | 610                          | 1,113                        | NA                       | 1,243                    | NA                       | 130                      |
| Red-Collared Myzomela         | <i>Myzomela rosenbergii</i>          | Nectarivore | 1,113                        | 2,520                        | 1,273                    | 2,520                    | 160                      | 0                        |
| Rufous-Backed Honeyeater      | <i>Ptiloprora guisei</i>             | Omnivore    | 1,341                        | 2,520                        | 1,853                    | 2,520                    | 512                      | 0                        |
| Spotted Honeyeater            | <i>Xanthis polygrammus</i>           | Omnivore    | 991                          | 1,402                        | NA                       | 1,321                    | NA                       | -81                      |
| Tawny-Breasted Honeyeater     | <i>Xanthis flaviventris</i>          | Insectivore | NA                           | 1,478                        | NA                       | 1,658                    | NA                       | 180                      |
| New Guinea Friarbird          | <i>Philemon novaeguineae</i>         | Omnivore    | NA                           | 610                          | NA                       | 1,243                    | NA                       | 633                      |
| Long-Billed Honeyeater        | <i>Meliphaga megarhynchus</i>        | Insectivore | NA                           | 1,643                        | NA                       | 1,633                    | NA                       | -10                      |
| Common Smoky Honeyeater       | <i>Meliphaga fumigata</i>            | Frugivore   | 1,113                        | 2,520                        | 1,338                    | 2,520                    | 225                      | 0                        |
| Olive Straightbill            | <i>Timeliopsis fulvigula</i>         | Insectivore | 1,762                        | 1,981                        | 1,633                    | 2,063                    | -129                     | 82                       |
| Black-Throated Honeyeater     | <i>Caligavis subfrenata</i>          | Nectarivore | 1,341                        | 2,520                        | 1,423                    | 2,520                    | 82                       | 0                        |
| Obscure Honeyeater            | <i>Caligavis obscura</i>             | Omnivore    | 610                          | 1,411                        | NA                       | 1,243                    | NA                       | -168                     |
| Yellow-Browed Melidectes      | <i>Melidectes rufocrissalis</i>      | Omnivore    | 1,219                        | 2,520                        | 1,338                    | 2,520                    | 119                      | 0                        |
| Ornate Melidectes             | <i>Melidectes torquatus</i>          | Omnivore    | 1,113                        | 1,341                        | 1,333                    | 1,888                    | 220                      | 547                      |
| Mottle-Breasted Honeyeater    | <i>Meliphaga mimikae</i>             | Omnivore    | 411                          | 1,372                        | NA                       | 1,313                    | NA                       | -59                      |
| Mountain Honeyeater           | <i>Meliphaga orientalis</i>          | Omnivore    | 1,113                        | 1,707                        | 1,423                    | 1,883                    | 310                      | 176                      |
| Mimic Honeyeater              | <i>Meliphaga analoga</i>             | Omnivore    | NA                           | 991                          | NA                       | 1,163                    | NA                       | 172                      |

Table S1. Cont.

| English name                  | Latin name                          | Diet        | Lower limit<br>(1965), m (1) | Upper limit<br>(1965), m (1) | Lower limit<br>(2012), m | Upper limit<br>(2012), m | Lower limit<br>change, m | Upper limit<br>change, m |
|-------------------------------|-------------------------------------|-------------|------------------------------|------------------------------|--------------------------|--------------------------|--------------------------|--------------------------|
| Puff-Backed Honeyeater        | <i>Meliphaga aruensis</i>           | Omnivore    | NA                           | 1,113                        | NA                       | 1,158                    | NA                       | 45                       |
| Rusty Mouse-Warbler           | <i>Crateroscelis murina</i>         | Insectivore | NA                           | 1,644                        | NA                       | 1,765                    | NA                       | 121                      |
| Mountain Mouse-Warbler        | <i>Crateroscelis robusta</i>        | Insectivore | 1,646                        | 2,520                        | 1,893                    | 2,520                    | 247                      | 0                        |
| Pale-Billed Scrubwren         | <i>Sericornis spilodera</i>         | Insectivore | 610                          | 1,292                        | NA                       | 1,443                    | NA                       | 151                      |
| Papuan Scrubwren              | <i>Sericornis papuensis</i>         | Insectivore | 1,966                        | 2,520                        | 1,943                    | 2,520                    | -23                      | 0                        |
| Large Scrubwren               | <i>Sericornis nouhuysi</i>          | Insectivore | 1,554                        | 2,520                        | 1,473                    | 2,426                    | -81                      | -94                      |
| Buff-Faced Scrubwren          | <i>Sericornis perspicillatus</i>    | Insectivore | 1,554                        | 1,935                        | 1,793                    | 2,013                    | 239                      | 78                       |
| Gray-Green Scrubwren          | <i>Sericornis arfakianus</i>        | Insectivore | 1,341                        | 1,524                        | 1,378                    | 1,783                    | 37                       | 259                      |
| Brown-Breasted Gerygone       | <i>Gerygone ruficollis</i>          | Insectivore | 1,280                        | 1,935                        | 1,447                    | 2,340                    | 167                      | 405                      |
| Fairy Gerygone                | <i>Gerygone palpebrosa</i>          | Insectivore | 411                          | 1,280                        | NA                       | 1,243                    | NA                       | -37                      |
| Goldenface                    | <i>Pachycare flavogriseum</i>       | Insectivore | 1,113                        | 1,646                        | NA                       | 1,923                    | NA                       | 277                      |
| Loria's Satinbird             | <i>Cnemophilus loriae</i>           | Frugivore   | 1,615                        | 2,316                        | 1,423                    | 2,373                    | -192                     | 57                       |
| Yellow-Breasted Satinbird     | <i>Loboparadisea sericea</i>        | Frugivore   | 610                          | 1,795                        | 1,433                    | 1,843                    | NA                       | 48                       |
| Black Berrypecker             | <i>Melanocharis nigra</i>           | Frugivore   | NA                           | 1,311                        | NA                       | 1,463                    | NA                       | 152                      |
| Fan-Tailed Berrypecker        | <i>Melanocharis versteri</i>        | Frugivore   | 1,372                        | 2,520                        | 1,388                    | 2,520                    | 16                       | 0                        |
| Streaked Berrypecker          | <i>Melanocharis striativentris</i>  | Frugivore   | 1,448                        | 1,817                        | 1,453                    | 1,873                    | 5                        | 56                       |
| Dwarf Longbill                | <i>Oedistoma iliolophus</i>         | Insectivore | 610                          | 1,562                        | NA                       | 1,653                    | NA                       | 91                       |
| Pygmy Longbill                | <i>Oedistoma pygmaeum</i>           | Nectarivore | NA                           | 1,113                        | NA                       | 1,288                    | NA                       | 175                      |
| Slaty-Headed Longbill         | <i>Toxorhamphus poliopterus</i>     | Nectarivore | NA                           | 1,768                        | NA                       | 1,993                    | NA                       | 225                      |
| Tit Berrypecker               | <i>Oreocharis arfaki</i>            | Frugivore   | 1,439                        | 2,520                        | 1,338                    | 2,520                    | -101                     | 0                        |
| Spotted Jewel-Babbler         | <i>Ptilorrhhoa leucosticta</i>      | Insectivore | 1,762                        | 1,981                        | 1,533                    | 2,083                    | -229                     | 102                      |
| Chestnut-Backed Jewel-Babbler | <i>Ptilorrhhoa castanonota</i>      | Insectivore | 610                          | 1,448                        | NA                       | 1,450                    | NA                       | 2                        |
| Yellow-Breasted Boatbill      | <i>Machaerirhynchus flaviventer</i> | Insectivore | NA                           | 1,250                        | NA                       | 1,243                    | NA                       | -7                       |
| Black-Breasted Boatbill       | <i>Machaerirhynchus nigripectus</i> | Insectivore | 1,588                        | 1,859                        | 1,243                    | 1,913                    | -345                     | 54                       |
| Mountain Peltops              | <i>Peltops montanus</i>             | Insectivore | 817                          | 1,554                        | NA                       | 2,105                    | NA                       | 551                      |
| Black Butcherbird             | <i>Cracticus quoyi</i>              | Omnivore    | 0                            | 1,332                        | NA                       | 1,328                    | NA                       | -4                       |
| Stout-Billed Cuckooshrike     | <i>Coracina caeruleoogrisea</i>     | Omnivore    | 991                          | 1,585                        | NA                       | 1,503                    | NA                       | -82                      |
| Gray-Headed Cuckooshrike      | <i>Coracina schisticeps</i>         | Frugivore   | NA                           | 1,280                        | NA                       | 1,338                    | NA                       | 58                       |
| Black-Bellied Cuckooshrike    | <i>Coracina montana</i>             | Insectivore | 1,262                        | 2,219                        | 1,338                    | 2,303                    | 76                       | 84                       |
| Golden Cuckooshrike           | <i>Campochaera sloetii</i>          | Frugivore   | NA                           | 1,113                        | NA                       | 1,243                    | NA                       | 130                      |
| Varied Triller                | <i>Lalage leucomela</i>             | Omnivore    | NA                           | 1,280                        | NA                       | 1,423                    | NA                       | 143                      |
| Mottled Whistler              | <i>Rhagologus leucostigma</i>       | Omnivore    | 1,113                        | 2,063                        | 1,323                    | 2,233                    | 210                      | 170                      |
| Wattled Ploughbill            | <i>Eulacestoma nigropectus</i>      | Insectivore | 1,905                        | 2,219                        | 2,013                    | 2,163                    | 108                      | -56                      |
| Rufous-Naped Whistler         | <i>Aleadryas rufinucha</i>          | Insectivore | 1,448                        | 1,817                        | 1,870                    | 2,073                    | 422                      | 256                      |
| Crested Pitohui               | <i>Ornorettes cristatus</i>         | Insectivore | 792                          | 1,311                        | NA                       | 1,353                    | NA                       | 42                       |
| Black Pitohui                 | <i>Melanorettes nigrescens</i>      | Insectivore | 1,570                        | 1,981                        | 1,573                    | 2,073                    | 3                        | 92                       |
| Rusty Whistler                | <i>Pachycephala hyperythra</i>      | Insectivore | 457                          | 1,280                        | NA                       | 1,348                    | NA                       | 68                       |
| Gray Whistler                 | <i>Pachycephala simplex</i>         | Insectivore | NA                           | 1,448                        | NA                       | 1,463                    | NA                       | 15                       |
| Slater's Whistler             | <i>Pachycephala soror</i>           | Insectivore | 1,113                        | 1,768                        | 1,243                    | 1,903                    | 130                      | 135                      |
| Regent Whistler               | <i>Pachycephala schlegelii</i>      | Insectivore | 1,341                        | 2,520                        | 1,753                    | 2,520                    | 412                      | 0                        |
| Rusty Pitohui                 | <i>Pseudorectes ferrugineus</i>     | Omnivore    | NA                           | 1,113                        | NA                       | 1,143                    | NA                       | 30                       |
| Little Shrikethrush           | <i>Colluricincla megarhyncha</i>    | Insectivore | NA                           | 1,646                        | NA                       | 1,743                    | NA                       | 97                       |
| Southern Variable Pitohui     | <i>Pitohui uropygialis</i>          | Insectivore | NA                           | 1,113                        | NA                       | 1,231                    | NA                       | 118                      |
| Hooded Pitohui                | <i>Pitohui dichrous</i>             | Insectivore | 457                          | 1,570                        | NA                       | 1,658                    | NA                       | 88                       |
| Brown Oriole                  | <i>Oriolus szalayi</i>              | Frugivore   | NA                           | 1,332                        | NA                       | 1,423                    | NA                       | 91                       |
| Pygmy Drongo                  | <i>Chaetorhynchus papuensis</i>     | Insectivore | 610                          | 1,463                        | NA                       | 1,493                    | NA                       | 30                       |
| Spangled Drongo               | <i>Dicrurus bracteatus</i>          | Insectivore | NA                           | 1,113                        | NA                       | 1,273                    | NA                       | 160                      |
| Northern Fantail              | <i>Rhipidura rufiventris</i>        | Insectivore | NA                           | 1,113                        | NA                       | 1,423                    | NA                       | 310                      |
| Sooty Thicket Fantail         | <i>Rhipidura threnothorax</i>       | Insectivore | NA                           | 1,113                        | NA                       | 1,243                    | NA                       | 130                      |
| Black Fantail                 | <i>Rhipidura atra</i>               | Insectivore | 1,247                        | 2,323                        | 1,241                    | 2,263                    | -6                       | -60                      |
| Chestnut-Bellied Fantail      | <i>Rhipidura hyperythra</i>         | Insectivore | NA                           | 1,329                        | NA                       | 1,658                    | NA                       | 329                      |
| Friendly Fantail              | <i>Rhipidura albolimbata</i>        | Insectivore | 1,411                        | 2,520                        | 1,633                    | 2,520                    | 222                      | 0                        |
| Dimorphic Fantail             | <i>Rhipidura brachyrhyncha</i>      | Insectivore | 1,981                        | 2,323                        | 1,920                    | 2,520                    | -61                      | 197                      |
| Black Monarch                 | <i>Symposiachrus axillaris</i>      | Insectivore | 1,113                        | 1,905                        | 1,188                    | 1,913                    | 75                       | 8                        |
| Spot-Winged Monarch           | <i>Symposiachrus guttula</i>        | Insectivore | NA                           | 1,113                        | NA                       | 1,183                    | NA                       | 70                       |
| Black-Winged Monarch          | <i>Monarcha frater</i>              | Insectivore | 610                          | 1,494                        | NA                       | 1,433                    | NA                       | -61                      |
| Golden Monarch                | <i>Carterornis chrysomela</i>       | Insectivore | NA                           | 1,256                        | NA                       | 1,193                    | NA                       | -63                      |
| Friilled Monarch              | <i>Arses telescopthalmus</i>        | Insectivore | NA                           | 1,494                        | NA                       | 1,273                    | NA                       | -221                     |
| Gray Crow                     | <i>Corvus tristis</i>               | Frugivore   | NA                           | 1,332                        | NA                       | 1,233                    | NA                       | -99                      |
| Blue-Capped Iffrit            | <i>Iffrita kowaldi</i>              | Insectivore | 1,905                        | 2,520                        | 1,863                    | 2,356                    | -42                      | -164                     |
| Crinkle-Collared Manucode     | <i>Manucodia chalybatus</i>         | Frugivore   | 610                          | 1,448                        | NA                       | 1,423                    | NA                       | -25                      |
| Princess Stephanie's Astrapia | <i>Astrapia stephaniae</i>          | Frugivore   | 1,554                        | 2,469                        | 1,833                    | 2,520                    | 279                      | 51                       |
| Superb Bird-of-Paradise       | <i>Lophorina superba</i>            | Omnivore    | 1,280                        | 1,905                        | 1,338                    | 1,961                    | 58                       | 56                       |
| Magnificent Riflebird         | <i>Ptiloris magnificus</i>          | Insectivore | NA                           | 1,219                        | NA                       | 1,458                    | NA                       | 239                      |
| Black Sicklebill              | <i>Epimachus fastosus</i>           | Insectivore | 1,585                        | 2,225                        | 1,713                    | 2,433                    | 128                      | 208                      |

Table S1. Cont.

| English name                 | Latin name                        | Diet        | Lower limit<br>(1965), m (1) | Upper limit<br>(1965), m (1) | Lower limit<br>(2012), m | Upper limit<br>(2012), m | Lower limit<br>change, m | Upper limit<br>change, m |
|------------------------------|-----------------------------------|-------------|------------------------------|------------------------------|--------------------------|--------------------------|--------------------------|--------------------------|
| Magnificent Bird-of-Paradise | <i>Diphylloides magnificus</i>    | Omnivore    | 610                          | 1,548                        | NA                       | 1,709                    | NA                       | 161                      |
| Raggiana Bird-of-Paradise    | <i>Paradisaea raggiana</i>        | Omnivore    | NA                           | 1,448                        | NA                       | 1,623                    | NA                       | 175                      |
| Black-Throated Robin         | <i>Poecilodryas albonotata</i>    | Insectivore | 1,905                        | 2,323                        | 1,723                    | 2,520                    | -182                     | 197                      |
| White-Winged Robin           | <i>Peneothello sigillata</i>      | Insectivore | 2,225                        | 2,520                        | 2,403                    | 2,520                    | 178                      | 0                        |
| Slaty Robin                  | <i>Peneothello cyanus</i>         | Insectivore | 1,585                        | 2,134                        | 1,683                    | 2,398                    | 98                       | 264                      |
| White-Rumped Robin           | <i>Peneothello bimaculata</i>     | Insectivore | 991                          | 1,113                        | NA                       | 1,283                    | NA                       | 170                      |
| White-Faced Robin            | <i>Tregellasia leucops</i>        | Insectivore | 1,113                        | 1,646                        | 1,198                    | 1,718                    | 85                       | 72                       |
| White-Eyed Robin             | <i>Pachycephalopsis poliosoma</i> | Insectivore | 985                          | 1,570                        | 1,218                    | 1,698                    | 233                      | 128                      |
| Canary Flyrobin              | <i>Microeca papuana</i>           | Insectivore | 1,859                        | 2,323                        | 1,763                    | 2,313                    | -96                      | -10                      |
| Garnet Robin                 | <i>Eugerygone rubra</i>           | Insectivore | 1,859                        | 2,185                        | 1,943                    | 2,213                    | 84                       | 28                       |
| Northern Scrub Robin         | <i>Drymodes superciliaris</i>     | Insectivore | 610                          | 1,280                        | NA                       | 1,393                    | NA                       | 113                      |
| Island Leaf Warbler          | <i>Phylloscopus maforensis</i>    | Insectivore | 1,311                        | 1,859                        | 1,321                    | 1,723                    | 10                       | -136                     |
| Russet-Tailed Thrush         | <i>Zoothera heinei</i>            | Insectivore | 1,082                        | 1,554                        | 1,473                    | 1,643                    | 391                      | 89                       |
| Red-Capped Flowerpecker      | <i>Dicaeum geelvinkianum</i>      | Frugivore   | NA                           | 1,762                        | NA                       | 1,723                    | NA                       | -39                      |
| Blue-Faced Parrotfinch       | <i>Erythrura trichroa</i>         | Frugivore   | 1,113                        | 2,323                        | 1,493                    | 2,313                    | 380                      | -10                      |

Nomenclature and order follow International Ornithological Committee (IOC) classification (2).

1. Diamond JM (1972) *Avifauna of the Eastern Highlands of New Guinea* (Nuttall Ornithological Club, Cambridge, MA), p vii.
2. Gill F, Donsker D (2013) IOC World Bird List, Version 3.5. Available at [www.worldbirdnames.org](http://www.worldbirdnames.org). Accessed December 11, 2013.

**Table S2. Elevational changes in Karkar Island's avifauna**

| English name               | Latin name                      | Diet        | Lower limit<br>(1969), m (1) | Upper limit<br>(1969), m (1) | Lower limit<br>(2013), m | Upper limit<br>(2013), m | Lower limit<br>change, m | Upper limit<br>change, m |
|----------------------------|---------------------------------|-------------|------------------------------|------------------------------|--------------------------|--------------------------|--------------------------|--------------------------|
| Brahminy Kite              | <i>Haliastur indus</i>          | Carnivore   | 0                            | 1,433                        | NA                       | 1,380                    | NA                       | -53                      |
| Meyer's Goshawk            | <i>Accipiter meyerianus</i>     | Carnivore   | 945                          | 1,433                        | 830                      | 1,380                    | -115                     | -53                      |
| Mackinlay's Cuckoo-Dove    | <i>Macropygia mackinlayi</i>    | Frugivore   | 0                            | 1,036                        | NA                       | 1,560                    | NA                       | 524                      |
| Great Cuckoo-Dove          | <i>Reinwardtoena reinwardti</i> | Frugivore   | 0                            | 1,189                        | NA                       | 1,350                    | NA                       | 161                      |
| Stephan's Emerald Dove     | <i>Chalcophaps stephani</i>     | Frugivore   | 0                            | 701                          | NA                       | 1,010                    | NA                       | 309                      |
| Wompoo Fruit Dove          | <i>Ptilinopus magnificus</i>    | Frugivore   | 0                            | 884                          | NA                       | 880                      | NA                       | -4                       |
| Superb Fruit Dove          | <i>Ptilinopus superbus</i>      | Frugivore   | 0                            | 1,128                        | NA                       | 1,290                    | NA                       | 162                      |
| White-Bibbed Fruit Dove    | <i>Ptilinopus rivoli</i>        | Frugivore   | 1,067                        | 1,524                        | 1,160                    | NA                       | 93                       | NA                       |
| Zoe's Imperial Pigeon      | <i>Ducula zoeae</i>             | Frugivore   | 0                            | 823                          | NA                       | 970                      | NA                       | 147                      |
| Coconut Lorikeet           | <i>Trichoglossus hematodus</i>  | Nectarivore | 0                            | 1,372                        | NA                       | 1,410                    | NA                       | 38                       |
| Brush Cuckoo               | <i>Cacomantis variolosus</i>    | Insectivore | 0                            | 1,311                        | NA                       | 1,380                    | NA                       | 69                       |
| Barking Owl                | <i>Ninox connivens</i>          | Carnivore   | 0                            | 1,036                        | NA                       | 970                      | NA                       | -66                      |
| Common Paradise Kingfisher | <i>Tanyiptera galatea</i>       | Insectivore | 0                            | 823                          | NA                       | 1,020                    | NA                       | 197                      |
| Variable Dwarf Kingfisher  | <i>Ceyx lepidus</i>             | Piscivore   | 0                            | 1,006                        | NA                       | 1,050                    | NA                       | 44                       |
| Hooded Pitta               | <i>Pitta sordida</i>            | Insectivore | 701                          | 1,189                        | NA                       | 1,330                    | NA                       | 141                      |
| Sclater's Myzomela         | <i>Myzomela sclateri</i>        | Nectarivore | 1,036                        | 1,831                        | 1,415                    | NA                       | 379                      | NA                       |
| Common Cicadabird          | <i>Coracina tenuirostris</i>    | Omnivore    | 0                            | 1,372                        | NA                       | 1,460                    | NA                       | 88                       |
| Island Monarch             | <i>Monarcha cinerascens</i>     | Insectivore | 0                            | 1,463                        | 1,250                    | 1,450                    | NA                       | -13                      |
| Shining Flycatcher         | <i>Myiagra alecto</i>           | Insectivore | 0                            | 1,219                        | NA                       | 1,360                    | NA                       | 141                      |
| Island Leaf Warbler        | <i>Phylloscopus maforensis</i>  | Insectivore | 1,097                        | 1,494                        | 1,090                    | NA                       | -7                       | NA                       |
| Metallic Starling          | <i>Aplonis metallica</i>        | Omnivore    | 0                            | 610                          | NA                       | 1,260                    | NA                       | 650                      |
| Singing Starling           | <i>Aplonis cantoroides</i>      | Omnivore    | 0                            | 1,189                        | NA                       | 1,440                    | NA                       | 251                      |
| Island Thrush              | <i>Turdus poliocephalus</i>     | Insectivore | 1,158                        | 1,524                        | 1,425                    | NA                       | 267                      | NA                       |
| Red-Capped Flowerpecker    | <i>Dicaeum geelvinkianum</i>    | Frugivore   | 0                            | 1,036                        | NA                       | 1,430                    | NA                       | 394                      |
| Olive-Backed Sunbird       | <i>Nectarinia jugularis</i>     | Nectarivore | 0                            | 1,189                        | NA                       | 1,260                    | NA                       | 71                       |
| Black Sunbird              | <i>Leptocoma sericea</i>        | Nectarivore | 0                            | 1,250                        | NA                       | 1,405                    | NA                       | 155                      |

Nomenclature and order follow IOC classification (2).

1. Diamond JM, Lecroy M (1979) Birds of Karkar and Bagabag Islands, New Guinea. *Bull Am Mus Nat Hist* 164:467-532.
2. Gill F, Donsker D (2013) IOC World Bird List, Version 3.5. Available at [www.worldbirdnames.org](http://www.worldbirdnames.org). Accessed December 11, 2013.

**Table S3. Measured and predicted distributional shifts reported by tropical and temperate resurveys**

| No. | Taxon                       | Site                             | Location  | Measured upslope shift, m | Predicted upslope shift, m | Shift rate | Source     |
|-----|-----------------------------|----------------------------------|-----------|---------------------------|----------------------------|------------|------------|
| 1   | Moths                       | Malaysia                         | Tropical  | 58.9                      | 127.3                      | 0.46       | (1)        |
| 2   | Butterflies                 | Czech Republic                   | Temperate | 7.8                       | 93.5                       | 0.08       | (2)        |
| 3   | Butterflies                 | Spain                            | Temperate | 108.6                     | 251.3                      | 0.43       | (3)        |
| 4   | Butterflies                 | United Kingdom                   | Temperate | 44.8                      | 98.2                       | 0.46       | (4)        |
| 5   | Butterflies                 | United Kingdom                   | Temperate | 11.1                      | 108.3                      | 0.10       | (5)        |
| 6   | Aquatic bugs                | United Kingdom                   | Temperate | 19.2                      | 90                         | 0.21       | (5)        |
| 7   | Dragonflies and damselflies | United Kingdom                   | Temperate | 61.9                      | 75                         | 0.83       | (5)        |
| 8   | Grasshoppers and allies     | United Kingdom                   | Temperate | 30.5                      | 75                         | 0.41       | (5)        |
| 9   | Ground beetles              | United Kingdom                   | Temperate | 12.7                      | 108.3                      | 0.12       | (5)        |
| 10  | Harvestmen                  | United Kingdom                   | Temperate | 35.8                      | 63.3                       | 0.57       | (5)        |
| 11  | Lacewings                   | United Kingdom                   | Temperate | 7.4                       | 108.3                      | 0.07       | (5)        |
| 12  | Longhorn beetles            | United Kingdom                   | Temperate | 39.3                      | 75                         | 0.52       | (5)        |
| 13  | Millipedes                  | United Kingdom                   | Temperate | 24                        | 108.3                      | 0.22       | (5)        |
| 14  | Soldier beetles and allies  | United Kingdom                   | Temperate | 62.1                      | 108.3                      | 0.57       | (5)        |
| 15  | Spiders                     | United Kingdom                   | Temperate | 24.3                      | 108.3                      | 0.22       | (5)        |
| 16  | Woodlice                    | United Kingdom                   | Temperate | 55.3                      | 75                         | 0.74       | (5)        |
| 17  | Fish                        | United Kingdom                   | Temperate | 32.7                      | 108.3                      | 0.30       | (5)        |
| 18  | Herptiles                   | Madagascar                       | Tropical  | 65.3                      | 43.6                       | 1.50       | (6)        |
| 19  | Birds                       | France                           | Temperate | -19.3                     | 194.9                      | -0.10      | (7)        |
| 20  | Birds                       | Italy                            | Temperate | 7.6                       | 200                        | 0.04       | (8)        |
| 21  | Birds                       | United States (New York)         | Temperate | -5.2                      | 103.4                      | -0.05      | (9)        |
| 22  | Birds                       | United Kingdom                   | Temperate | -2.1                      | 40                         | -0.05      | (5)        |
| 23  | Mammals                     | United Kingdom                   | Temperate | 31                        | 75                         | 0.41       | (5)        |
| 24  | Mammals                     | United States (California)       | Temperate | 69                        | 433.3                      | 0.16       | (10)       |
| 25  | Plants                      | Italy                            | Temperate | 88.6                      | 272.2                      | 0.33       | (11)       |
| 26  | Plants                      | Switzerland                      | Temperate | 20.7                      | 78.3                       | 0.26       | (12)       |
| 27  | Plants                      | Switzerland                      | Temperate | 89                        | 208.3                      | 0.43       | (13)       |
| 28  | Plants                      | United States (Vermont)          | Temperate | 69                        | 206.9                      | 0.33       | (14)       |
| 29  | Plants                      | United States (California)       | Temperate | 64.9                      | 56.2                       | 1.15       | (15)       |
| 30  | Plants                      | West Europe                      | Temperate | 64.8                      | 115.4                      | 0.56       | (16)       |
| 31  | Birds                       | Peru                             | Tropical  | 49                        | 152                        | 0.32       | (17)       |
| 32  | Birds                       | Papua New Guinea (Karkar Island) | Tropical  | 147.4                     | 90                         | 1.64       | This study |
| 33  | Birds                       | Papua New Guinea (Mt. Karimui)   | Tropical  | 107.2                     | 76                         | 1.41       | This study |
| 34  | Plants                      | Taiwan                           | Tropical  | 213                       | 210                        | 1.01       | (18)       |
| 35  | Plants                      | Peru                             | Tropical  | 3                         | 6                          | 0.50       | (19)       |

- Chen IC, et al. (2009) Elevation increases in moth assemblages over 42 years on a tropical mountain. *Proc Natl Acad Sci USA* 106(5):1479–1483.
- Konvicka M, Maradova M, Benes J, Fric Z, Kepka P (2003) Uphill shifts in distribution of butterflies in the Czech Republic: Effects of changing climate detected on a regional scale. *Glob Ecol Biogeogr* 12(5):403–410.
- Wilson RJ, et al. (2005) Changes to the elevational limits and extent of species ranges associated with climate change. *Ecol Lett* 8(11):1138–1146.
- Franco A, et al. (2006) Impacts of climate warming and habitat loss on extinctions at species' low-latitude range boundaries. *Glob Change Biol* 12(8):1545–1553.
- Hickling R, Roy DB, Hill JK, Fox R, Thomas CD (2006) The distributions of a wide range of taxonomic groups are expanding polewards. *Glob Change Biol* 12(3):450–455.
- Raxworthy CJ, et al. (2008) Extinction vulnerability of tropical montane endemism from warming and upslope displacement: A preliminary appraisal for the highest massif in Madagascar. *Glob Change Biol* 14(8):1703–1720.
- Archaux F (2004) Breeding upwards when climate is becoming warmer: No bird response in the French Alps. *Ibis* 146(1):138–144.
- Popy S, Bordignon L, Prodon R (2010) A weak upward elevational shift in the distributions of breeding birds in the Italian Alps. *J Biogeogr* 37(1):57–67.
- Zuckerberg B, Woods AM, Porter WF (2009) Poleward shifts in breeding bird distributions in New York State. *Glob Change Biol* 15(8):1866–1883.
- Moritz C, et al. (2008) Impact of a century of climate change on small-mammal communities in Yosemite National Park, USA. *Science* 322(5899):261–264.
- Parolo G, Rossi G (2008) Upward migration of vascular plants following a climate warming trend in the Alps. *Basic Appl Ecol* 9(2):100–107.
- Holzing B, Hülber K, Camenisch M, Grabherr G (2008) Changes in plant species richness over the last century in the eastern Swiss Alps: Elevational gradient, bedrock effects and migration rates. *Plant Ecol* 195(2):179–196.
- Bergamini A, Ungricht S, Hofmann H (2009) An elevational shift of cryophilous bryophytes in the last century—an effect of climate warming? *Divers Distrib* 15(5):871–879.
- Beckage B, et al. (2008) A rapid upward shift of a forest ecotone during 40 years of warming in the Green Mountains of Vermont. *Proc Natl Acad Sci USA* 105(11):4197–4202.
- Kelly AE, Goulden ML (2008) Rapid shifts in plant distribution with recent climate change. *Proc Natl Acad Sci USA* 105(33):11823–11826.
- Lenoir J, Gégout JC, Marquet PA, de Ruffray P, Brisse H (2008) A significant upward shift in plant species optimum elevation during the 20th century. *Science* 320(5884):1768–1771.
- Forero-Medina G, Terborgh J, Socolar SJ, Pimm SL (2011) Elevational ranges of birds on a tropical montane gradient lag behind warming temperatures. *PLoS ONE* 6(12):e28535.
- Jump AS, Huang TJ, Chou CH (2012) Rapid altitudinal migration of mountain plants in Taiwan and its implications for high altitude biodiversity. *Ecography* 35(3):204–210.
- Feeley KJ, et al. (2011) Upslope migration of Andean trees. *J Biogeogr* 38(4):783–791.
